# Supplementary material for: Design and in situ synthesis of hierarchical SAPO-34@kaolin composites as catalysts for methanol to olefins
Source: Royal Society of Chemistry journal article supplement (doi:10.1039/c9cy01663e), 2019-01-01
Supplement: c9cy01663e1.pdf [file c9cy01663e1.pdf]

Electronic supplementary information for

**Design and in-situ synthesis of hierarchical SAPO-34@kaolin composites as  
catalysts for methanol to olefins**

Lina Zhang, ‡<sup>a</sup> Haiyan Liu, ‡<sup>a</sup> Yuanyuan Yue, <sup>b</sup> Unni Olsbye, <sup>c</sup> and Xiaojun Bao, <sup>ab\*</sup>

*<sup>a</sup>State Key Laboratory of Heavy Oil Processing, China University of Petroleum, Beijing 102249,  
P. R. China*

*<sup>b</sup>National Engineering Research Center of Chemical Fertilizer, College of Chemical Engineering,  
Fuzhou University, Fuzhou 350116, P. R. China*

*<sup>c</sup>Center for Materials Science and Nanotechnology, Institute of Chemistry, University of Oslo,  
P.O. Box Blindern, N-0315 Oslo, Norway*

*\*Corresponding author: [baoxj@fzu.edu.cn](mailto:baoxj@fzu.edu.cn) (X. Bao)*

**Table of contents**

- 1. Supplementary Tables**
- 2. Supplementary Figures**
- 3. References**

## 1. Supplementary Table

**Table S1.** Compositions of the raw KMS and the active SiO<sub>2</sub>, Al<sub>2</sub>O<sub>3</sub>, and P<sub>2</sub>O<sub>5</sub> contents of the thermally treated KMS.

| Content (wt.%)                                                          | Raw KMS <sup>a</sup> | Thermally treated KMS at different temperatures |                     |                     |                     |
|-------------------------------------------------------------------------|----------------------|-------------------------------------------------|---------------------|---------------------|---------------------|
|                                                                         |                      | 600 °C <sup>b</sup>                             | 700 °C <sup>b</sup> | 800 °C <sup>b</sup> | 900 °C <sup>b</sup> |
| SiO <sub>2</sub>                                                        | 48.6                 | 0.8                                             | 3.5                 | 2.6                 | 3.0                 |
| Al <sub>2</sub> O <sub>3</sub>                                          | 44.6                 | 19.4                                            | 37.7                | 30.2                | 11.9                |
| P <sub>2</sub> O <sub>5</sub>                                           | 0.3                  | 0.0                                             | 0.3                 | 0.1                 | 0.3                 |
| SiO <sub>2</sub> /Al <sub>2</sub> O <sub>3</sub> (mol/mol)              | -                    | 0.08                                            | 0.16                | 0.15                | 0.43                |
| P <sub>2</sub> O <sub>5</sub> /Al <sub>2</sub> O <sub>3</sub> (mol/mol) | -                    | 0.000                                           | 0.006               | 0.002               | 0.020               |

Notes: <sup>a</sup> The composition of the raw KMS was analyzed by XRF; <sup>b</sup> the contents of active SiO<sub>2</sub>, Al<sub>2</sub>O<sub>3</sub>, and P<sub>2</sub>O<sub>5</sub> were quantified by ICP-AES.

**Table S2.** Deconvolution results of the  $^{29}\text{Si}$  MAS NMR spectra of S@KMS, S@KMS-C, and S@KMS-CT based on the normalized peak areas of the different Si species.

| Sample   | SAPO domain    | SA domain      |                     |                     |                     |                |
|----------|----------------|----------------|---------------------|---------------------|---------------------|----------------|
|          | Si(4Al)<br>(%) | Si(4Al)<br>(%) | Si(3Al, 1Si)<br>(%) | Si(2Al, 2Si)<br>(%) | Si(1Al, 3Si)<br>(%) | Si(4Si)<br>(%) |
| S@KMS    | 8.66           | 4.97           | 8.94                | 15.48               | 27.32               | 34.63          |
| S@KMS-C  | 8.90           | 3.87           | 10.10               | 14.86               | 38.03               | 24.23          |
| S@KMS-CT | 9.04           | 5.52           | 12.74               | 14.03               | 32.38               | 26.29          |

## 2. Supplementary Figures

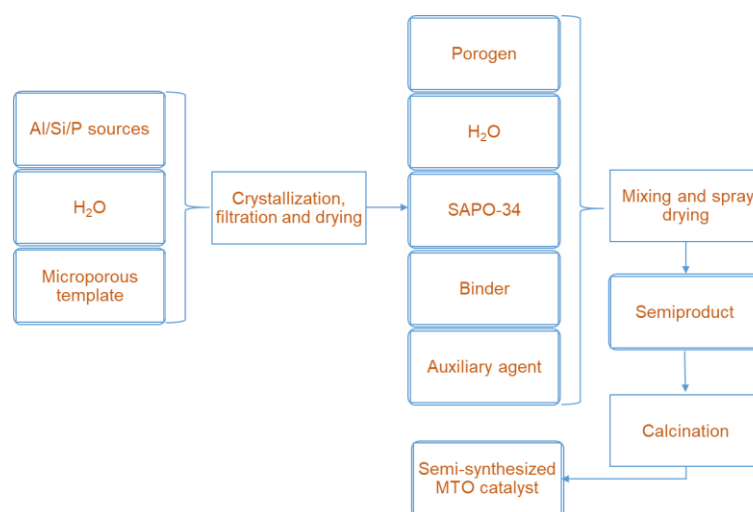

**Fig. S1.** Semi-synthesis of SAPO-34 based MTO catalyst.<sup>1</sup>

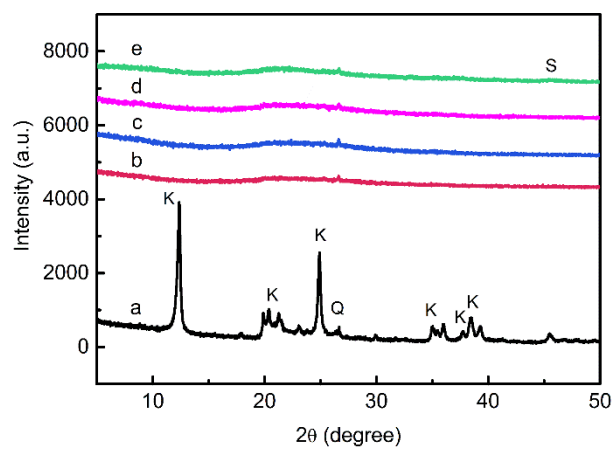

**Fig. S2.** XRD patterns of the raw KMS (a) and the KMS thermally activated at 600 °C (b), 700 °C (c), 800 °C (d), and 900 °C (e). K, Q, and S denote kaolinite, quartz, and spinel, respectively.

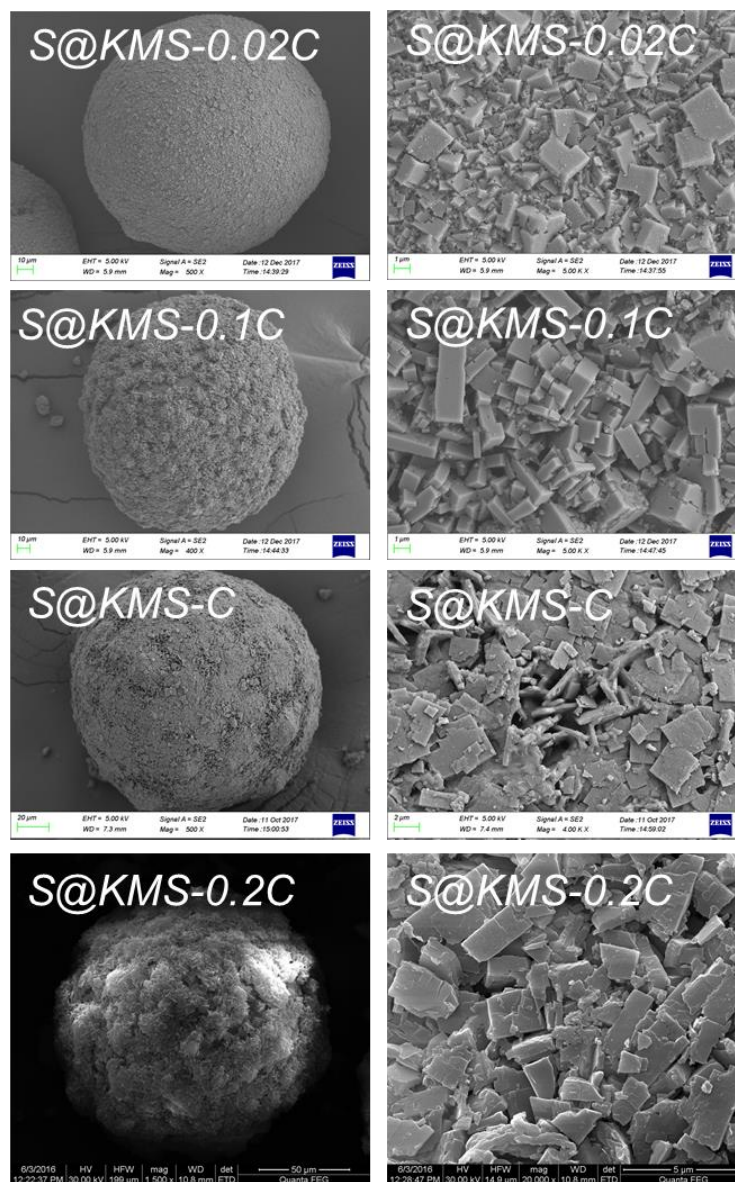

**Fig. S3.** SEM images of the samples synthesized with different amounts of CTAB.

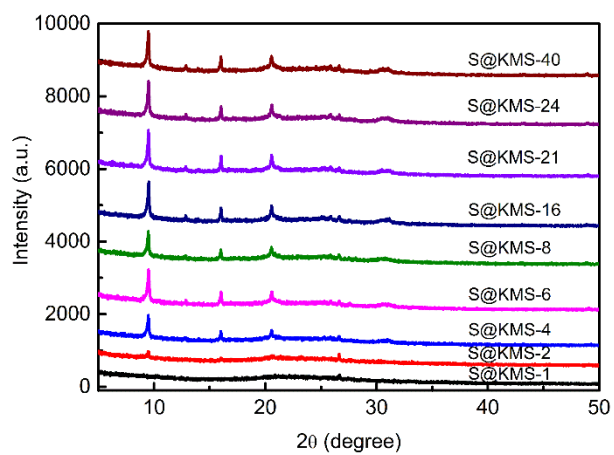

**Fig. S4.** XRD patterns of S@KMS-x (x denotes crystallization time) obtained after crystallization for different lengths of time without any surfactant.

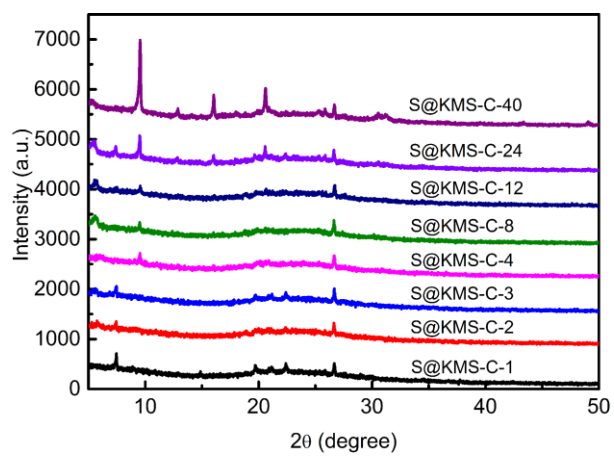

**Fig. S5.** XRD patterns of S@KMS-C-x (x denotes crystallization time) obtained after crystallization for different lengths of time in the presence of CTAB.



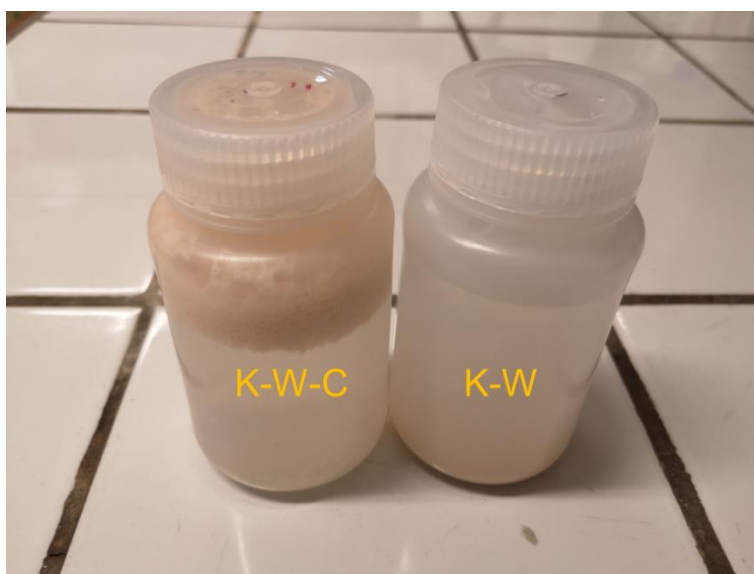

**Fig. S6.** The image of the two mixtures (K-W and K-W-C) after agitation at 200 °C for 3 h.

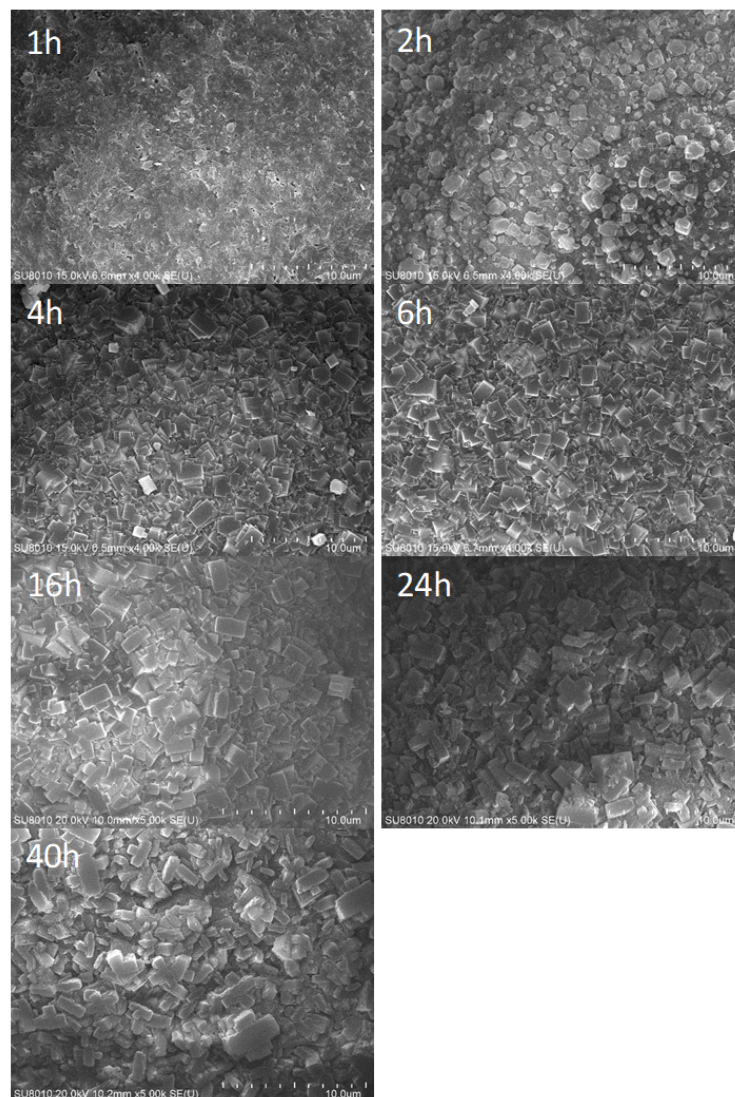

**Fig. S7.** SEM images of the samples obtained after crystallization for different lengths of time without the involvement of any surfactant: S@KMS-1, S@KMS-2, S@KMS-4, S@KMS-6, S@KMS-16, S@KMS-24, and S@KMS-40.

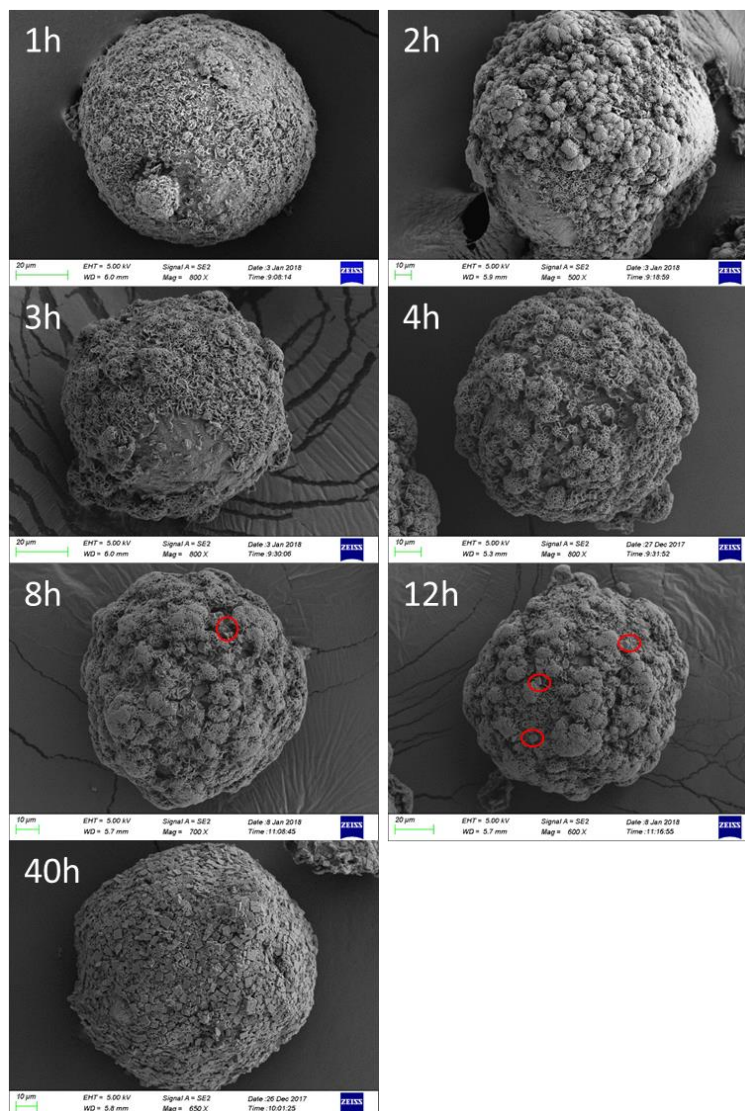

**Fig. S8.** SEM images of the samples obtained after crystallization for different lengths of time in the presence of CTAB: S@KMS-C-1, S@KMS-C-2, S@KMS-C-3, S@KMS-C-4, S@KMS-C-8, S@KMS-C-12, and S@KMS-C-40.

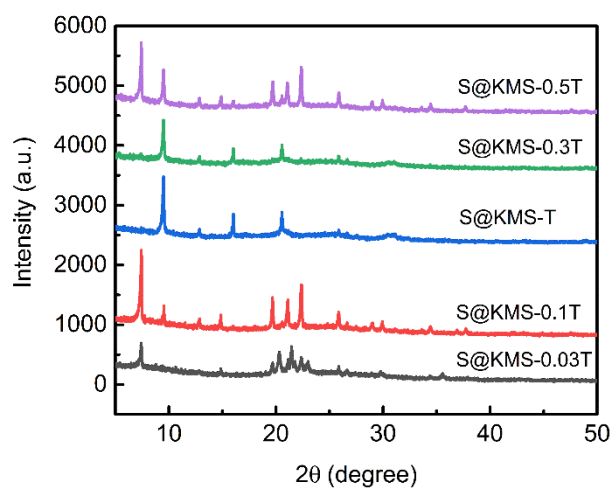

**Fig. S9.** XRD patterns of the samples synthesized with different amounts of TPOAC.

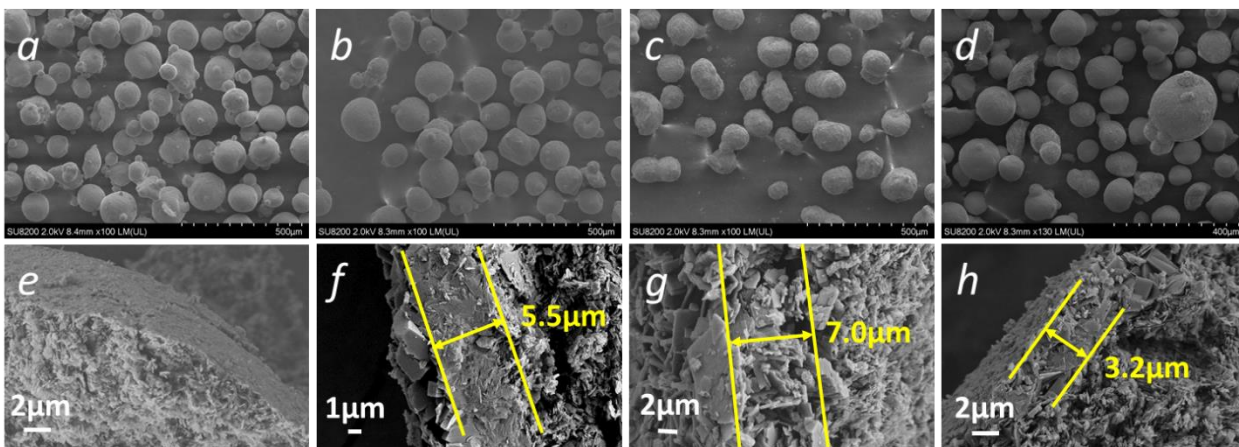

**Fig. S10.** The overall and cross-sectional SEM images of KMS (a and e), S@KMS (b and f), S@KMS-C (c and g), and S@KMS-CT (d and h).

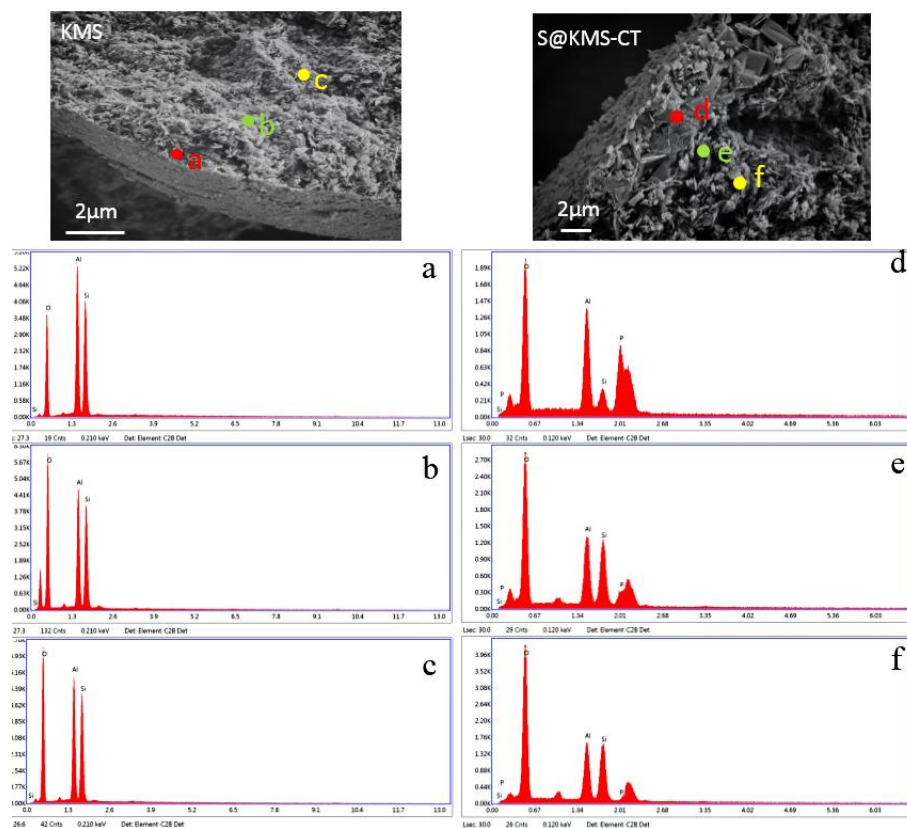

**Fig. S11.** The cross-sectional EDS analysis results of the KMS and S@KMS-CT at (a) spot a, (b) spot b, (c) spot c, (d) spot d, (e) spot e, and (f) spot f.

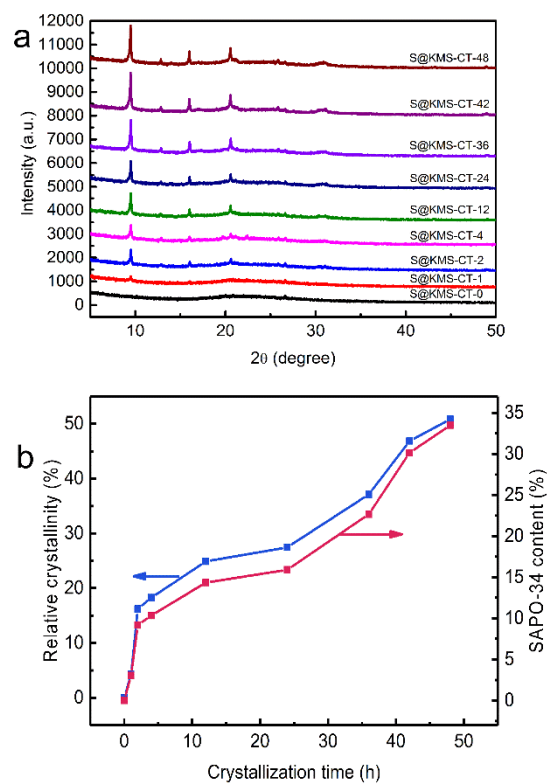

**Fig. S12.** XRD patterns (a) and corresponding relative crystallinities and SAPO-34 contents of the samples (b) obtained after crystallization for different lengths of time with the involvement of both CTAB and TPOAC.



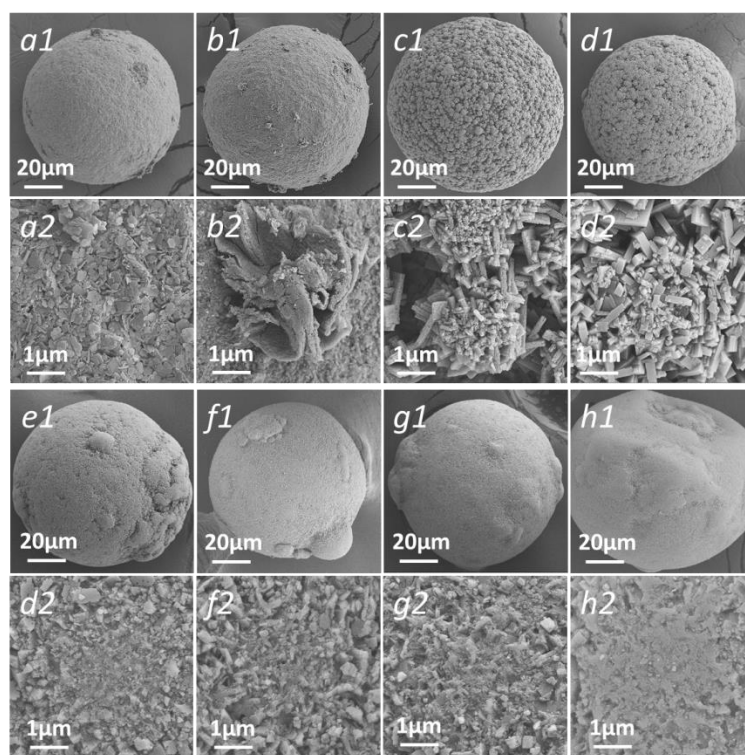

**Fig. S13.** SEM images of the samples obtained after crystallization for different lengths of time with the simultaneous involvement of CTAB and TPOAC: S@KMS-CT-0 (a1, a2), S@KMS-CT-1 (b1, b2), S@KMS-CT-2 (c1, c2), S@KMS-CT-4 (d1, d2), S@KMS-CT-12 (e1, e2), S@KMS-CT-24 (f1, f2), S@KMS-CT-36 (g1, g2), and S@KMS-CT-42 (h1, h2).



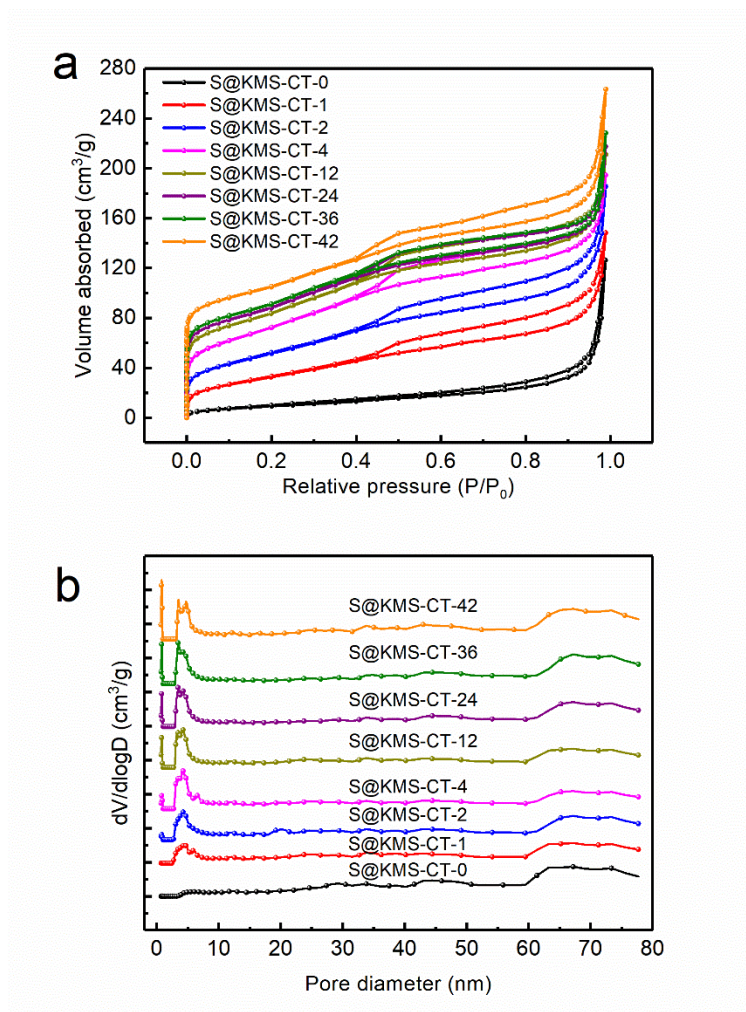

**Fig. S14.** N<sub>2</sub> adsorption-desorption isotherms (a) and the corresponding NDFT pore size distributions of the S@KMS-CT-x samples (b) obtained after crystallization for different lengths of time.

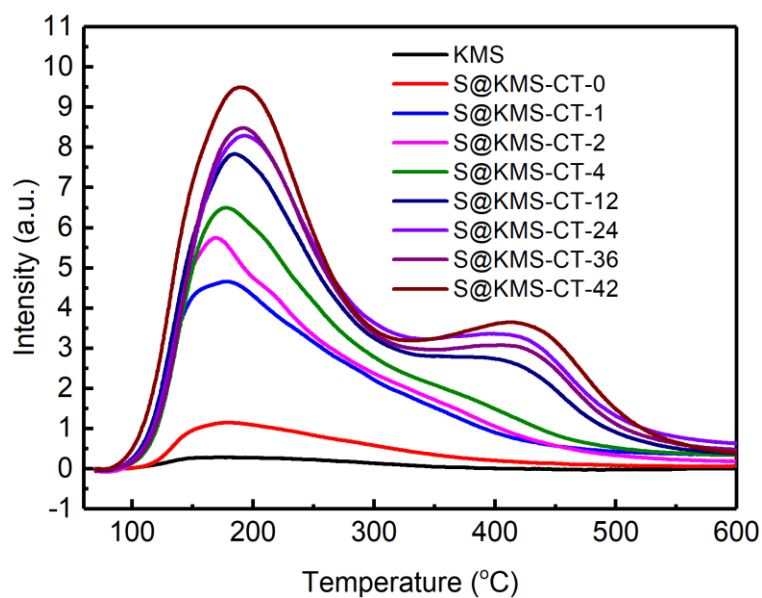

**Fig. S15.** NH<sub>3</sub>-TPD curves of the samples synthesized after crystallization for different lengths of time with the involvement of both CTAB and TPOAC.

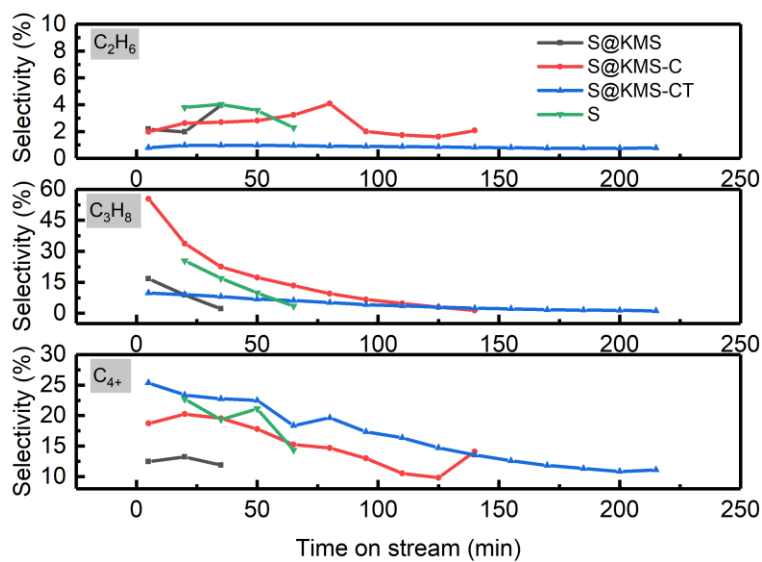

**Fig. S16.** Selectivity to C<sub>2</sub>H<sub>6</sub>, C<sub>3</sub>H<sub>8</sub>, and C<sub>4</sub><sup>+</sup> over S@KMS, S@KMS-C, S@KMS-CT, and S (reaction conditions: 450 °C, WHSV = 2.5 h<sup>-1</sup>, and 95 wt.% aqueous methanol solution).

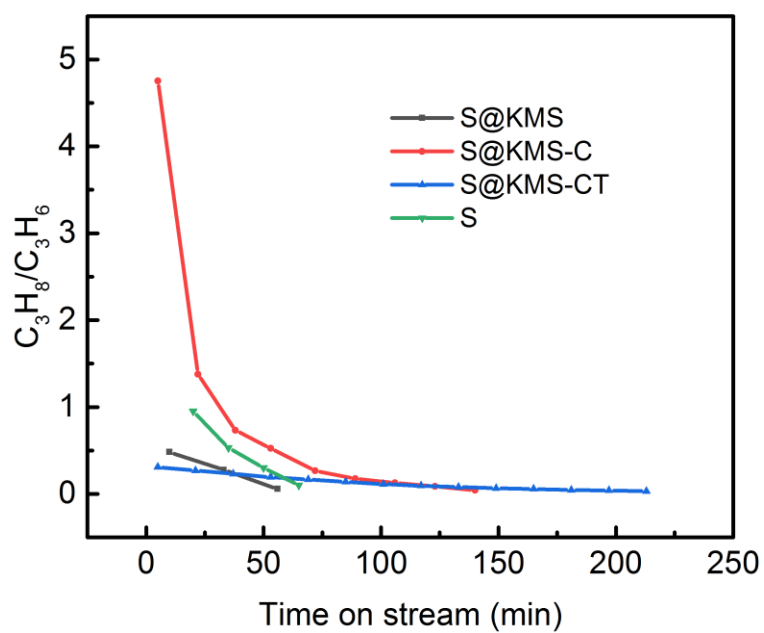

**Fig. S17.** Hydrogen transfer indexes (HTIs  $C_3H_8/C_3H_6$ ) values of methanol conversion over S, S@KMS, S@KMS-C, and S@KMS-CT.

### 3. References

1. P. Tian, Y. Wei, M. Ye and Z. Liu, *ACS Catal.*, 2015, **5**, 1922-1938.
